# Supplementary material
Source: Springer Nature journal article supplement (https://www.springermedizin.de/resource/supplementary/12906_2012_1272_MOESM1_ESM.pdf/9522296)
Supplement: MOESM1 [file 9522296]

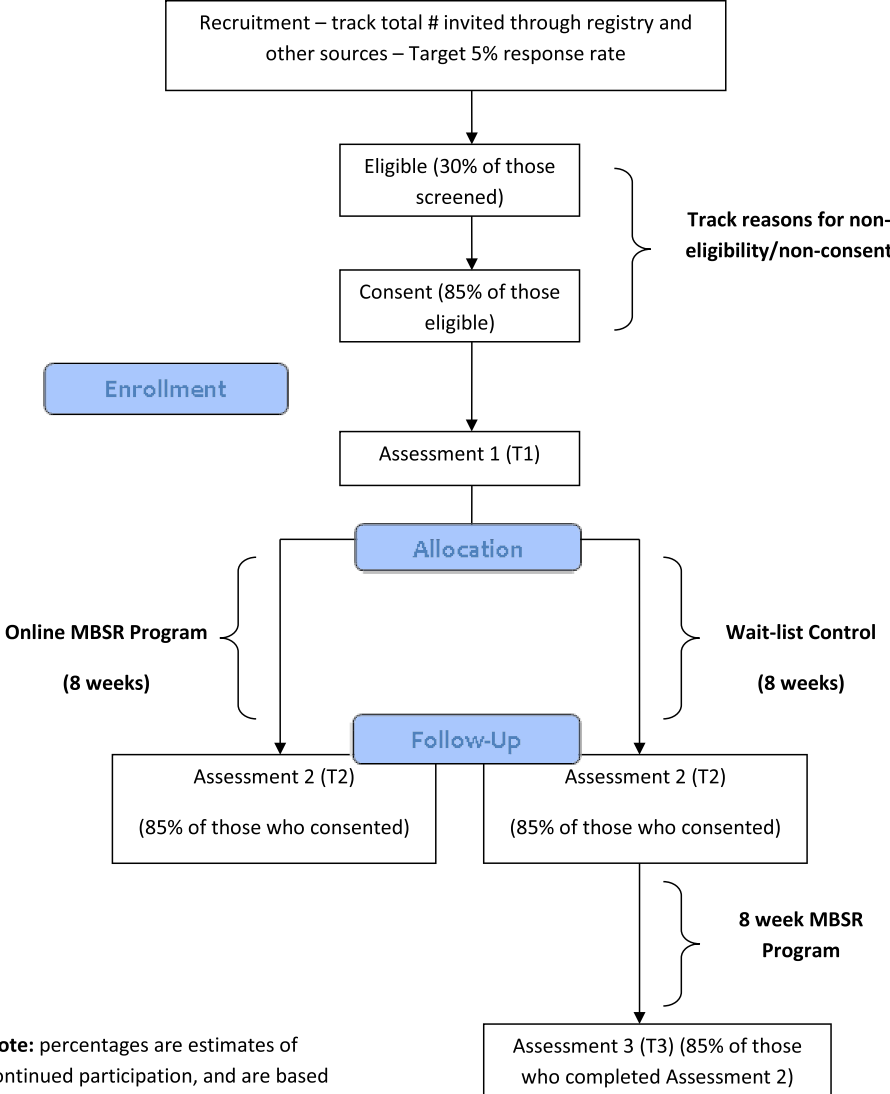

**Note:** percentages are estimates of continued participation, and are based on previous F2F MBSR research studies conducted through the Tom Baker Cancer Centre, and hypothesized eligibility and drop-out rates.
